# Supplementary material for: Does Eating-Away-from-Home Increase the Risk of a Metabolic Syndrome Diagnosis?
Source: MDPI journal article supplement (doi:10.3390/ijerph16040575), 2019-02-16
Supplement: s1 [file s1]

Supplementary file

Table S1 Multivariable adjusted<sup>1</sup> association between Mets and EAFH

|                | Total population (n=4518) | Female (n=2441)     | Male (n=2077)       |
|----------------|---------------------------|---------------------|---------------------|
| EAFH frequency | 1.104(1.049, 1.162)       | 0.972(0.911, 1.037) | 1.083(1.027, 1.141) |
| Female         | 1.143(0.914, 1.430)       |                     |                     |
| Female*fafh    | 0.859(0.796, 0.928)       |                     |                     |
| Age            | 1.143(1.105, 1.183)       | 1.174(1.114, 1.238) | 1.144(1.090, 1.201) |
| Square of age  | 0.999(0.999, 0.999)       | 0.999(0.998, 0.999) | 0.999(0.998, 0.999) |

<sup>1</sup> Adjusted for age and age squared, educational level (primary, middle and high), ln(income), smoking (current smoking or no), drinking (current drink or no), physical activity (light, moderate and heavy), localization (urban or rural; north or south), total energy intake and fat share. For total population regression, sex was added in addition. EAFH frequency was measured by the number of meals ate away from home during the three-day period.

<sup>2</sup> Values are ORs (95%CI) unless otherwise indicated.

Table S2 Multivariable adjusted<sup>1</sup> association between Mets and EAFH by regions

|                  | Urban<br>(n=1398)   | Rural<br>(n=3120)   | South<br>(n=2619)   | North<br>(n=1899)   |
|------------------|---------------------|---------------------|---------------------|---------------------|
| Never(referent)  | 1                   | 1                   | 1                   | 1                   |
| Sometimes        | 1.466(0.920, 2.336) | 1.457(1.026, 2.069) | 1.648(1.145, 2.372) | 1.456(0.929, 2.280) |
| Often            | 2.074(1.149, 3.743) | 1.366(0.809, 2.307) | 2.103(1.327, 3.331) | 1.219(0.578, 2.574) |
| Female           | 1.193(0.767, 1.855) | 1.145(0.875, 1.499) | 1.523(1.080, 2.150) | 0.946(0.692, 1.294) |
| Female*sometimes | 0.736(0.401, 1.351) | 0.579(0.350, 0.959) | 0.547(0.341, 0.878) | 0.565(0.289, 1.105) |
| Female*often     | 0.417(0.172, 1.008) | 0.521(0.232, 1.173) | 0.310(0.150, 0.642) | 0.708(0.249, 2.012) |
| Middle aged      | 2.523(1.767, 3.604) | 1.757(1.415, 2.181) | 2.062(1.581, 2.688) | 1.838(1.423, 2.374) |
| Elderly adults   | 2.634(1.679, 4.133) | 1.651(1.244, 2.190) | 2.187(1.587, 3.014) | 1.553(1.087, 2.218) |

<sup>1</sup> Adjusted for age and age squared, educational level (primary, middle and high), ln(income), smoking (current smoking or no), drinking (current drink or no), physical activity (light, moderate and heavy), localization (urban or rural; north or south), total energy intake and fat share. For total population regression, regional dummy was added in addition. Never, sometimes, and often refer to the frequency of EAFH during the three-day period: never (0), sometimes (>0 and <=3), and often (>3 and <=12).

<sup>2</sup> Values are ORs (95%CI) unless otherwise indicated.

Table S3 Frequency of various meals EAFH by age and gender

| Meals       | Young         |       |              |       | Middle aged    |       |              |       | Old            |       |              |       |
|-------------|---------------|-------|--------------|-------|----------------|-------|--------------|-------|----------------|-------|--------------|-------|
|             | Female(n=987) |       | Male (n=819) |       | Female (n=937) |       | Male (n=757) |       | Female (n=517) |       | Male (n=501) |       |
|             | Mean          | S. D. | Mean         | S. D. | Mean           | S. D. | Mean         | S. D. | Mean           | S. D. | Mean         | S. D. |
| break_away  | 0.42          | 0.95  | 0.49         | 1.01  | 0.29           | 0.84  | 0.41         | 0.96  | 0.24           | 0.75  | 0.21         | 0.69  |
| lunch_away  | 0.48          | 1.00  | 0.50         | 1.01  | 0.21           | 0.67  | 0.44         | 0.96  | 0.11           | 0.49  | 0.14         | 0.57  |
| dinner_away | 0.21          | 0.66  | 0.22         | 0.67  | 0.10           | 0.44  | 0.19         | 0.63  | 0.08           | 0.41  | 0.07         | 0.40  |
| snack_away  | 0.11          | 0.50  | 0.09         | 0.46  | 0.08           | 0.45  | 0.11         | 0.52  | 0.06           | 0.34  | 0.07         | 0.42  |
| Frequency   | 1.23          | 2.23  | 1.30         | 2.24  | 0.68           | 1.61  | 1.15         | 2.13  | 0.49           | 1.34  | 0.49         | 1.41  |
| Share_EAFH  | 12.21%        | 0.22  | 13.47%       | 0.23  | 6.82%          | 0.16  | 11.84%       | 0.22  | 5.03%          | 0.14  | 5.01%        | 0.14  |

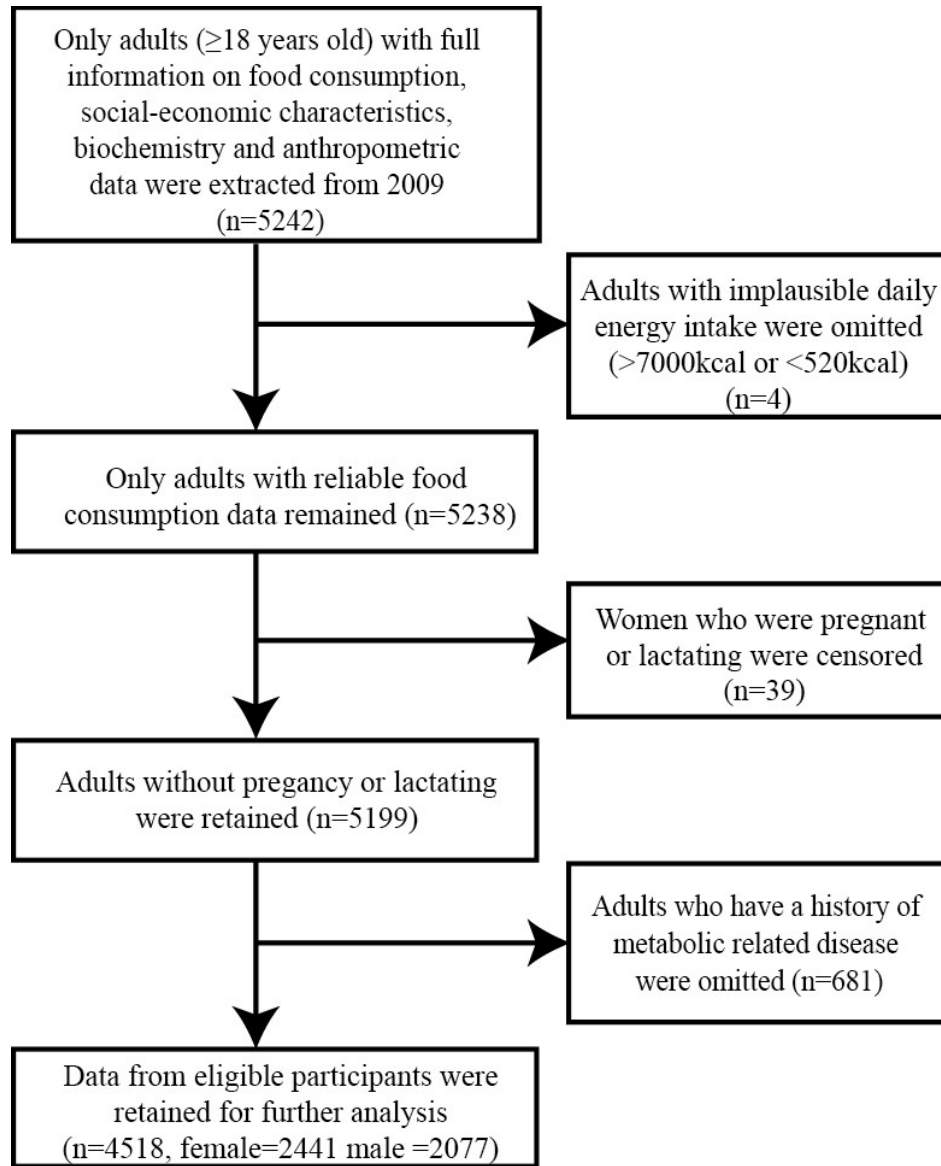

Figure S1 Selection of sample in the study

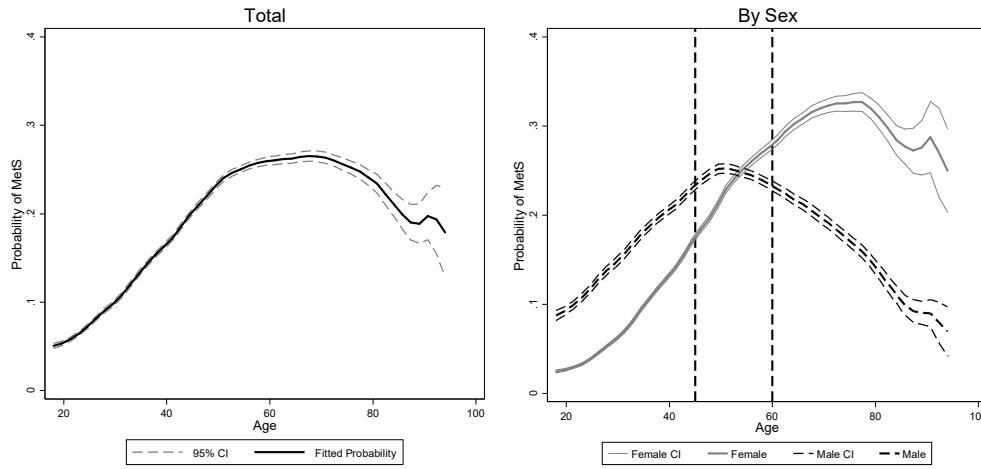

Figure S2 Association between predicted risk of getting metabolic syndrome and age
